# Supplementary material for: NAIP/NLRC4 inflammasome activation in MRP8+ cells is sufficient to cause systemic inflammatory disease
Source: PubMed Central journal article supplement (PMC5738432; doi:10.1038/s41467-017-02266-w), 2017-12-20
Supplement: 41467_2017_2266_MOESM1_ESM.pdf [file 41467_2017_2266_MOESM1_ESM.pdf]

**Supplementary Fig. 1**

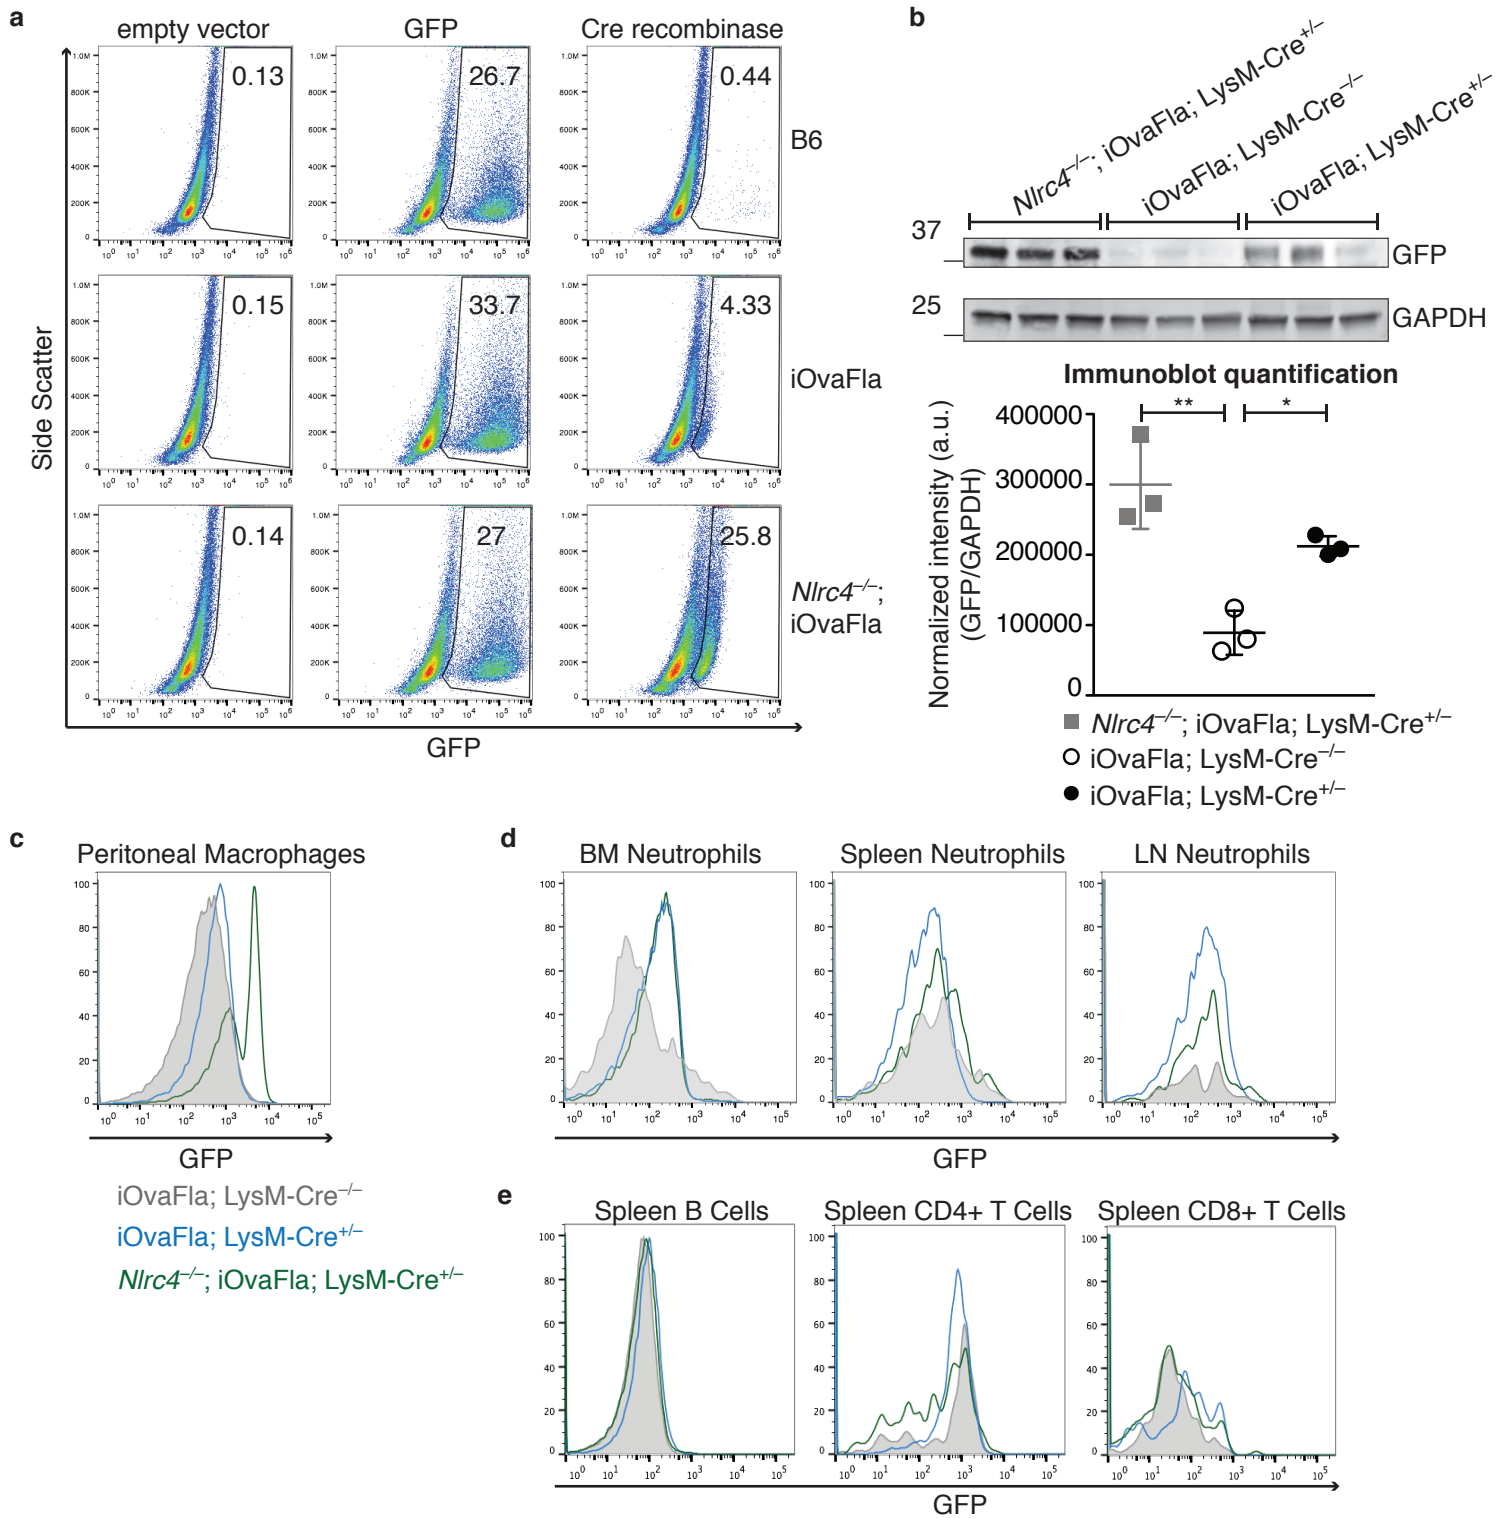

**Supplementary Fig. 1. Genetic system for cell type-specific inflammasome activation in vivo.** (a) Retroviral transduction of B6, iOvaFla<sup>+/+</sup>, and *Nlr4*<sup>-/-</sup>; iOvaFla<sup>+/+</sup> BMMs with either an empty MSCV vector, MSCV vector containing only GFP, or MSCV vector expressing Cre Recombinase. (b) GFP immunoblot and quantification performed on *ex vivo* peritoneal macrophages. Quantification was performed using Licor image studio light. GFP histograms of (c) peritoneal macrophages, (d) neutrophils from the bone marrow, spleen, or lymph nodes, and (e) splenic B cells (CD19<sup>+</sup> TCRb<sup>-</sup>), CD4<sup>+</sup> (TCRb<sup>+</sup> C19<sup>-</sup> CD4<sup>+</sup>), and CD8<sup>+</sup> T cells (TCRb<sup>+</sup> C19<sup>-</sup> CD8<sup>+</sup>). Data in (c - e) are representative from n=3 biological replicates and (a - d) two or (e) three independent experiments. Error bars are s.d. Results were analyzed with an one-way ANOVA and Bonferroni post-tests; \* = p < 0.05, \*\* = p < 0.01.

## Supplementary Fig. 2

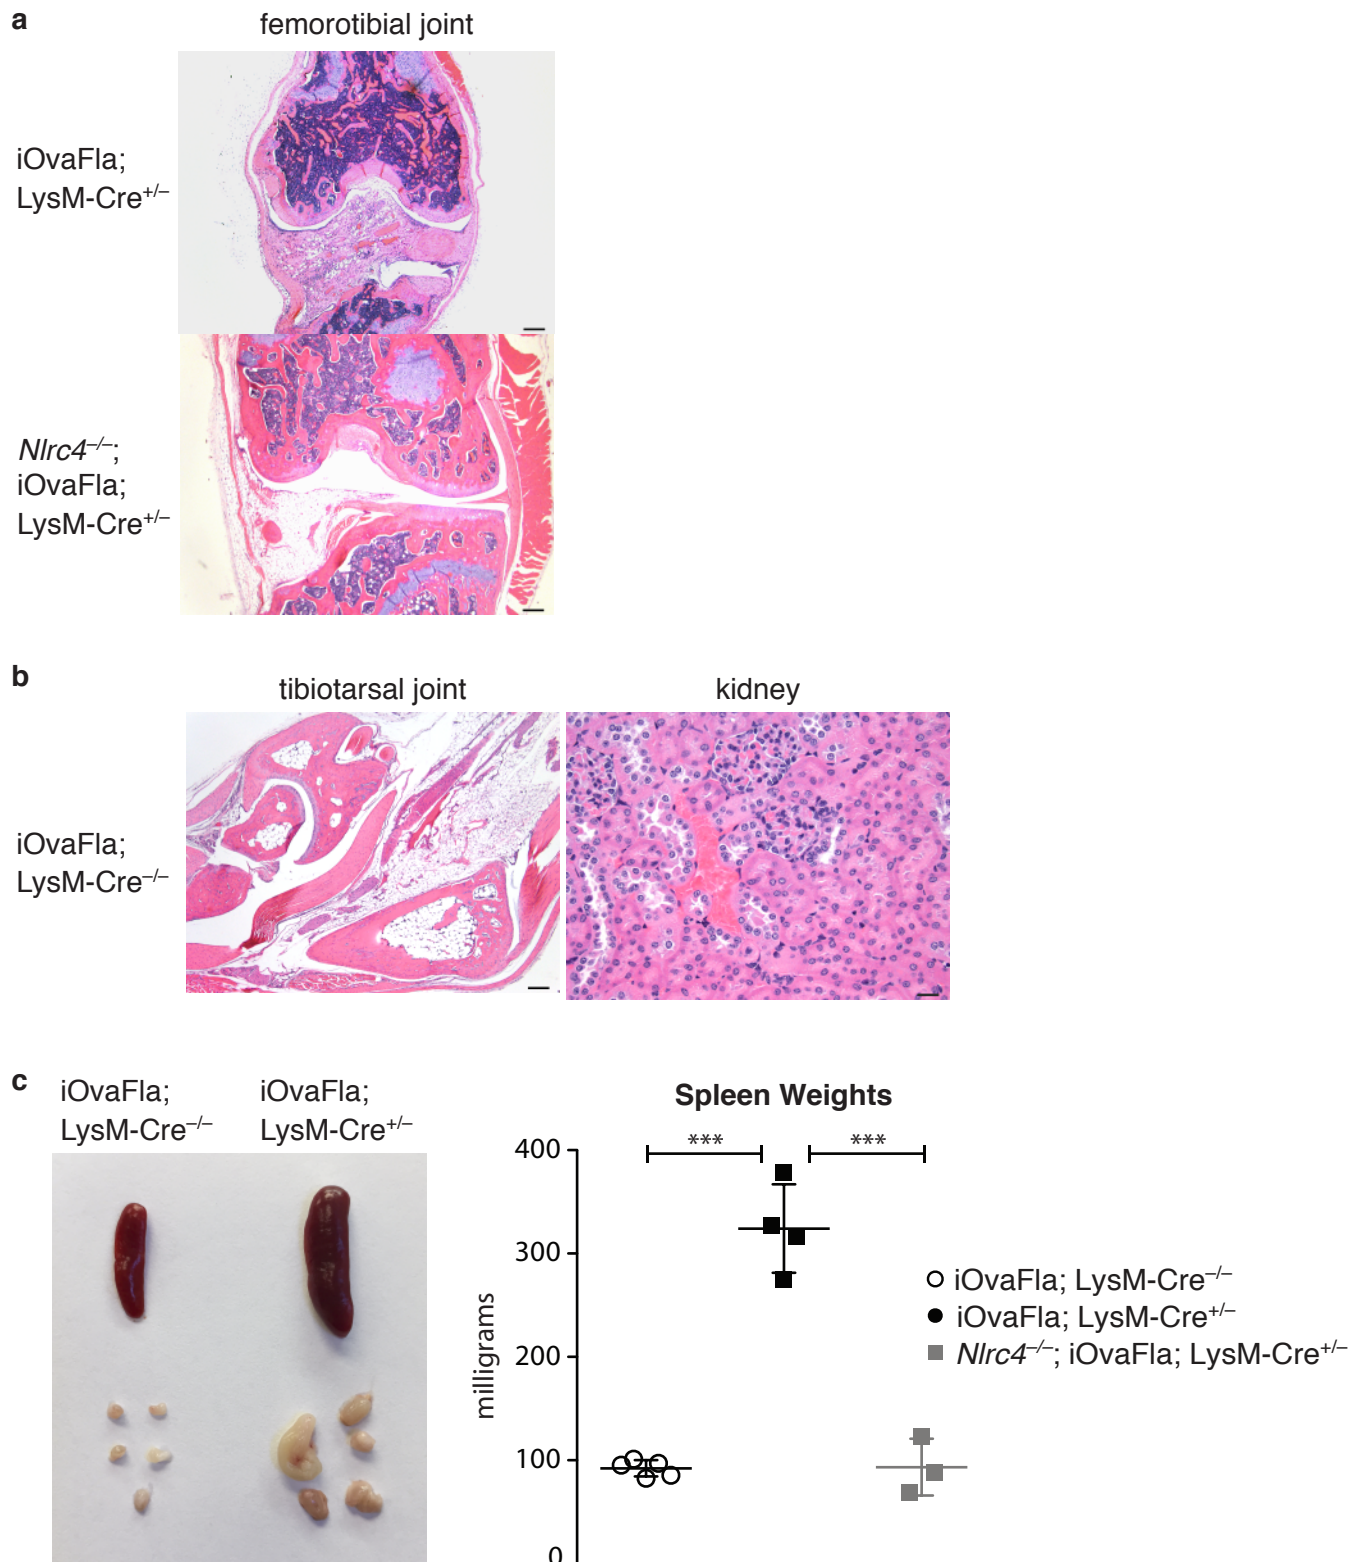

**Supplementary Fig. 2. Systemic inflammation in iOvaFla<sup>+/-</sup>; LysM-Cre<sup>+/-</sup> mice. Histology images showing (a)** femorotibial joint in 10 week iOvaFla; LysM-Cre<sup>+/-</sup> mice compared to *Nlrc4*<sup>-/-</sup>; iOvaFla; LysM-Cre<sup>+/-</sup> mice (representative from 3 biological replicates) and **(b)** tibiotarsal joint and kidney of iOvaFla; LysM-Cre<sup>-/-</sup> mice (representative from 2 biological replicates; femorotibial and tibiotarsal joints at magnification X40 and scale bar is 500 microns; kidney at magnification X400 and scale bar is 20 microns). **(c)** Spleen and lymph nodes of iOvaFla; LysM-Cre<sup>-/-</sup> and iOvaFla; LysM-Cre<sup>+/-</sup> mice and spleen weights from iOvaFla; LysM-Cre<sup>-/-</sup>, iOvaFla; LysM-Cre<sup>+/-</sup>, *Nlrc4*<sup>-/-</sup>; iOvaFla; LysM-Cre<sup>+/-</sup> mice (representative from two separate experiments). Error bars are s.d. Results were analyzed with a one-way ANOVA and Bonferroni post-tests; \*\*\* = *p* < 0.001.

### Supplementary Fig. 3

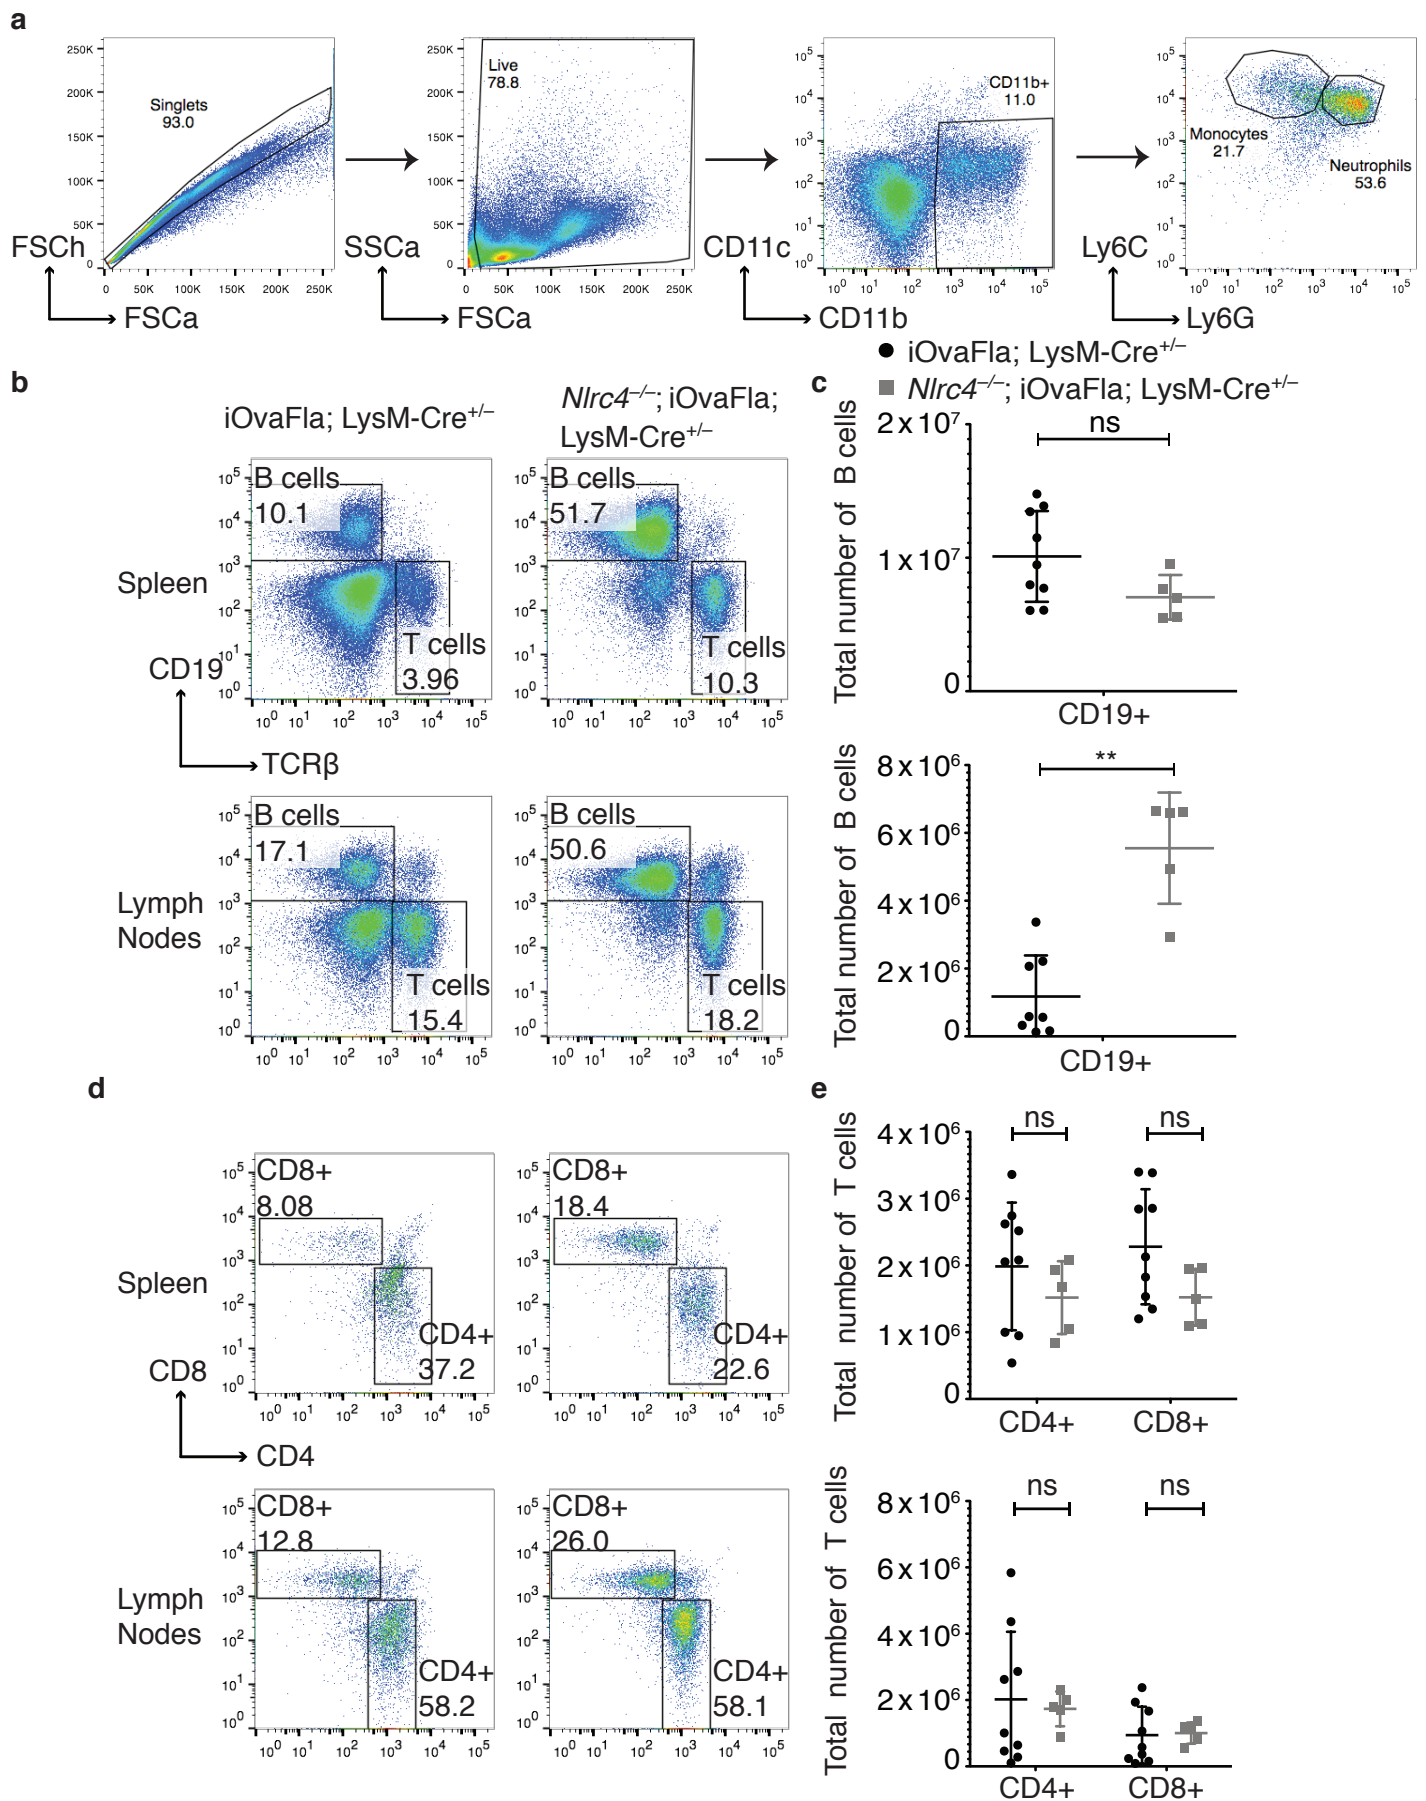

**Supplementary Fig. 3. Lymphocyte populations mostly unchanged in *iOvaFla; LysM-Cre<sup>+/-</sup>* mice. (a)** Gating strategy to determine monocytes and neutrophils. Example is an *iOvaFla; LysM-Cre<sup>+/-</sup>* mouse. **(b)** Flow cytometry and **(c)** quantification of B cells ( $CD19^+ TCR\beta^-$ ). **(d)** Flow cytometry and **(e)** quantification of  $CD4^+$  ( $TCR\beta^+ C19^- CD4^+$ ) and  $CD8^+$  T cells ( $TCR\beta^+ C19^- CD8^+$ ). b – e are representative of 3 independent experiments. Error bars are s.d. Results were analyzed with either a Mann-Whitney t-test or two-way ANOVA and Bonferroni post-tests; \* =  $p < 0.05$ , \*\* =  $p < 0.01$ , \*\*\* =  $p < 0.001$ .

## Supplementary Fig. 4

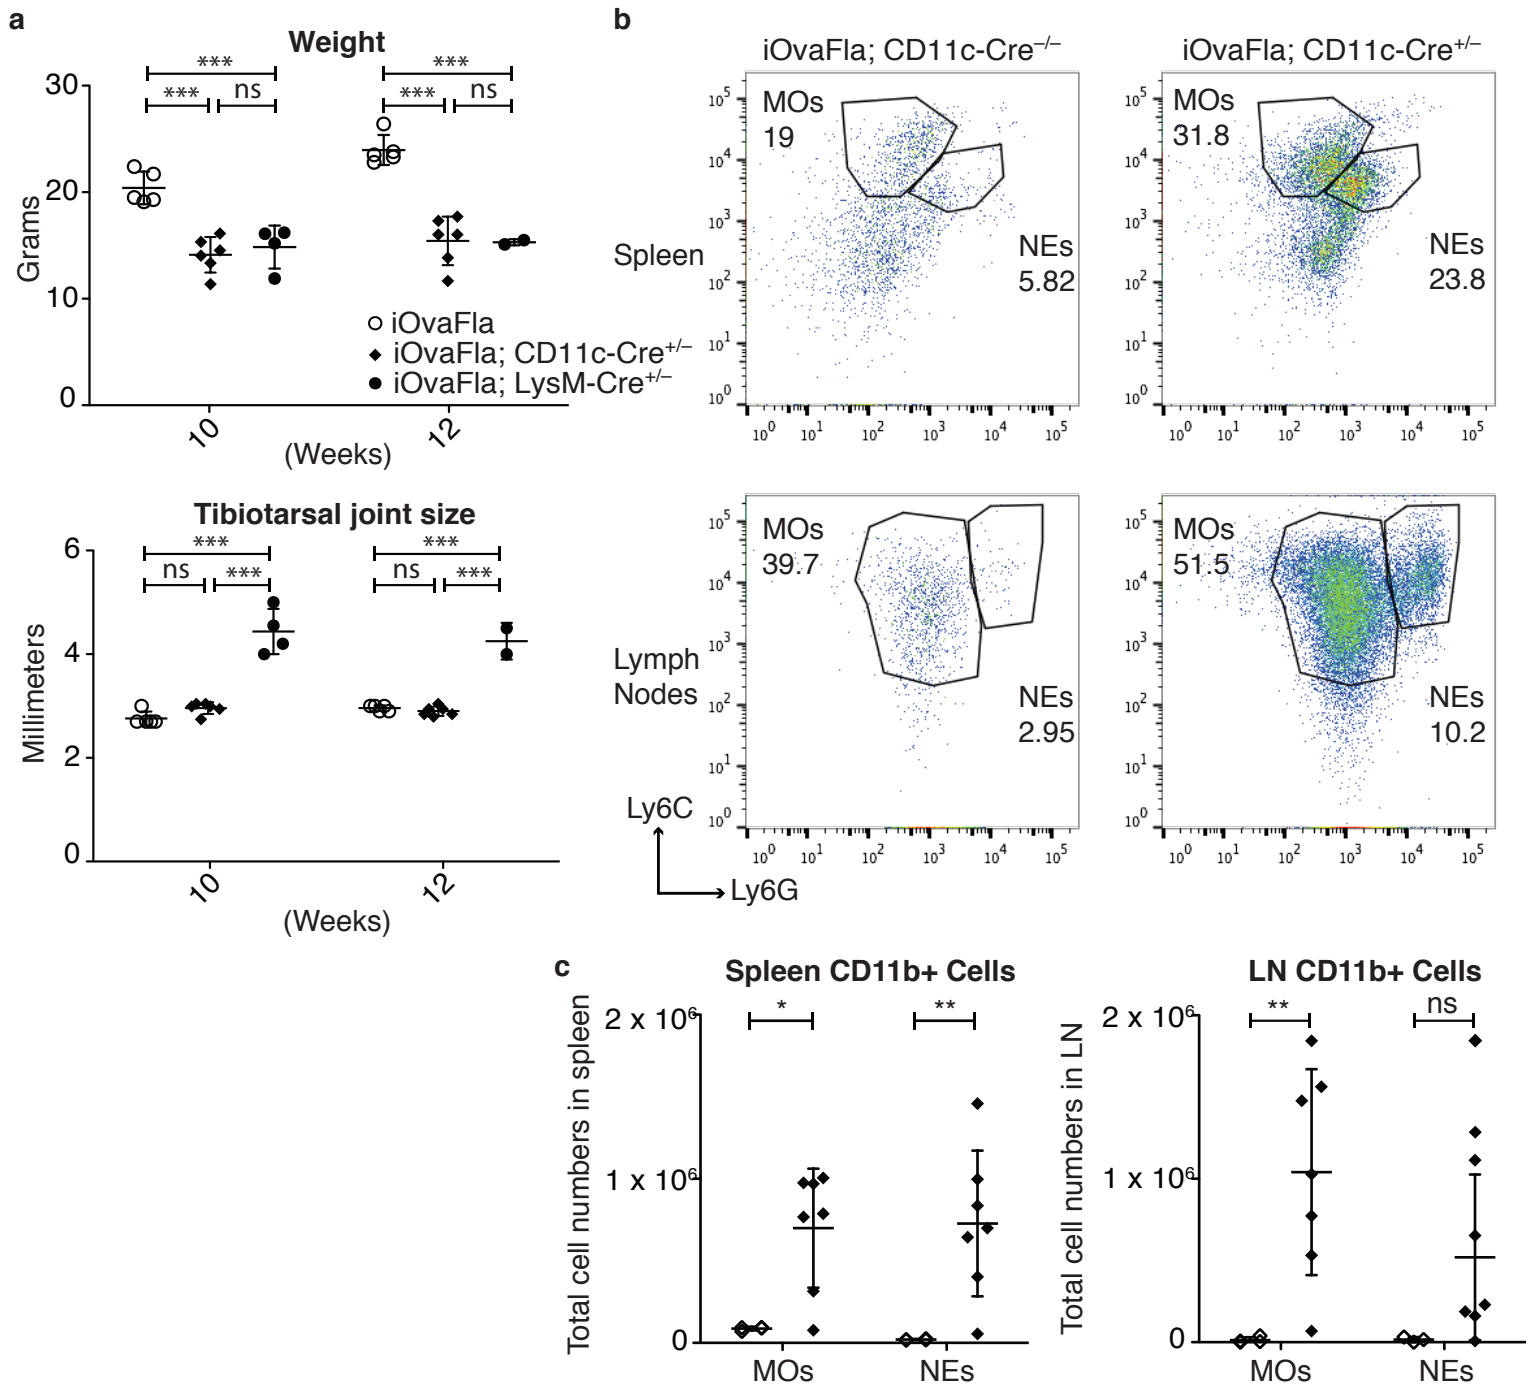

**Supplementary Fig. 4. iOvaFla; CD11c-Cre<sup>+/-</sup> mice have a less severe inflammatory phenotype. (a)** Weight and tibiotarsal joint swelling as iOvaFla; Cre<sup>-/-</sup>, iOvaFla; CD11c-Cre<sup>+/-</sup>, and iOvaFla; LysM-Cre<sup>+/-</sup> mice age. **(b and c).** Flow cytometry plots and cell number graphs are a compilation of two separate experiments of mice aged 12-20 weeks old. For the flow cytometry plot, the top row is from the spleen and the second row from peripheral and mesenteric lymph nodes. Each column represents a different genotype. **(b)** Flow cytometry and **(c)** quantification of monocytes (MO; CD11b<sup>+</sup> Ly6C<sup>Hi</sup> Ly6G<sup>Lo</sup>) and neutrophils (NE; CD11b<sup>+</sup> Ly6C<sup>Lo</sup> Ly6G<sup>Hi</sup>). Data in (b, c) are representative of two independent experiments. Error bars are s.d. Results were analyzed with a two-way ANOVA and Bonferroni post-tests; \* =  $p < 0.05$ , \*\* =  $p < 0.01$ , \*\*\* =  $p < 0.001$ .

**Supplemental Table 1**

| <b>Antibody</b>       | <b>Clone</b> | <b>Used at</b> | <b>Supplier</b>      |
|-----------------------|--------------|----------------|----------------------|
| Anti-CD11b PB         | M1/70        | 1:250          | eBiosciences 48-0112 |
| Anti-CD11c APC        | N418         | 1:250          | eBiosciences 17-0114 |
| Anti-Ly6G PE Cy7      | 1A8          | 1:250          | Biolegend 127618     |
| Anti-Ly6C PerCP Cy5.5 | HK1.4        | 1:250          | eBiosciences 45-5932 |
| Anti-MHCII PE         | M5/114.15.2  | 1:500          | eBiosciences 12-5321 |
| Anti-CD19 PE          | eBio1D3      | 1:250          | eBiosciences 12-0193 |
| Anti-CD3 APC          | 145-2C11     | 1:250          | eBiosciences 17-0031 |
| Anti-CD4 PerCP e710   | GK1.5        | 1:250          | eBiosciences 25-0041 |
| Anti-CD8 APC Cy7      | 53-6.7       | 1:250          | eBiosciences 47-0081 |

Table listing all the flow cytometry antibodies used, the antibody clone, concentration used, and the supplier and catalogue number.
